# Supplementary material
Source: ML conference proceedings conference paper supplement (https://proceedings.mlr.press/v130/horii21a.html)
Supplement: Supplementary file 1 [file horii21a-supp.pdf]

---

# Bayesian Model Averaging for Causality Estimation and its Approximation based on Gaussian Scale Mixture Distributions

---

## 1 Derivation of the analytical form of $p(G|D^N)$ and $p(\boldsymbol{\theta}_G|G, D^N)$

First, we derive  $p(\boldsymbol{\theta}_G|G, D^N)$  for a fixed  $G \in \mathcal{G}$ . For  $j \in \{1, \dots, m\}$ , let  $\text{pa}(X_j) = (X_{j_1}, X_{j_2}, \dots, X_{j_{m_j}})$  and  $\mathbf{X}_j = [\mathbf{x}_{j_1}, \mathbf{x}_{j_2}, \dots, \mathbf{x}_{j_{m_j}}] \in \mathbb{R}^{N \times m_j}$ , where  $\mathbf{x}_i \in \mathbb{R}^N$  is the sample of  $X_i$ . Then, for  $\boldsymbol{\theta}_j = (\theta_{j_1 j}, \theta_{j_2 j}, \dots, \theta_{j_{m_j} j})$ , the likelihood function  $p(D^N|G, \boldsymbol{\theta}_j)$  is given by

$$p(D^N|G, \boldsymbol{\theta}_j) = \mathcal{N}(\mathbf{x}_j; \mathbf{X}_j \boldsymbol{\theta}_j, \tau \mathbf{I}_{m_j}) + \text{const.}, \quad (1)$$

where  $\mathbf{I}_{m_j}$  is the identity matrix of size  $m_j$ . Since we assumed a conjugate Gaussian prior for  $p(\boldsymbol{\theta}_G|D)$ , the posterior distribution  $p(\boldsymbol{\theta}_j|G, D^N)$  is given by

$$p(\boldsymbol{\theta}_j|G, D^N) = \mathcal{N}(\boldsymbol{\theta}_j; \boldsymbol{\mu}_j, \boldsymbol{\Sigma}_j), \quad (2)$$

$$\boldsymbol{\mu}_j = s_\epsilon \boldsymbol{\Sigma}_j \mathbf{X}_j^T \mathbf{x}_j, \quad (3)$$

$$\boldsymbol{\Sigma}_j = (s_\epsilon \mathbf{X}_j^T \mathbf{X}_j + \tau^{-1} \mathbf{I}_{m_j})^{-1}. \quad (4)$$

Further, we can calculate the likelihood  $p(D^N|G)$  as follows.

$$p(D^N|G) = \prod_{j=1}^m p(\mathbf{x}_j|\mathbf{X}_j), \quad (5)$$

$$p(\mathbf{x}_j|\mathbf{X}_j) = \frac{m_j}{2} \ln \tau^{-1} + \frac{N}{2} \ln s_\epsilon - E_j - \frac{1}{2} \ln |\mathbf{A}_j| - \frac{N}{2} \ln(2\pi), \quad (6)$$

$$E_j = \frac{s_\epsilon}{2} \|\mathbf{x}_j - \mathbf{X}_j \boldsymbol{\mu}_j\|^2 + \frac{\tau^{-1}}{2} \boldsymbol{\mu}_j^T \boldsymbol{\mu}_j, \quad (7)$$

$$\mathbf{A}_j = \tau^{-1} \mathbf{I}_{m_j} + s_\epsilon \mathbf{X}_j^T \mathbf{X}_j. \quad (8)$$

We can calculate the posterior probability  $p(G|D^N)$  by using the Bayes rule. See [Bishop, 2006] for the derivation of (2) and (6).

## 2 Derivation of Variational Bayes algorithm

The joint distribution for  $\mathbf{x}_j, \mathbf{X}_j, \boldsymbol{\theta}_j, \boldsymbol{\tau}_j, \boldsymbol{\alpha}_j$  is factorized as

$$p(\mathbf{x}_j, \mathbf{X}_j, \boldsymbol{\theta}_j, \boldsymbol{\tau}_j, \boldsymbol{\alpha}_j) = p(\mathbf{x}_j | \mathbf{X}_j, \boldsymbol{\theta}_j) p(\boldsymbol{\theta}_j | \boldsymbol{\tau}_j) p(\boldsymbol{\tau}_j | \boldsymbol{\alpha}_j) p(\boldsymbol{\alpha}_j; \kappa, \nu). \quad (9)$$

Let  $\boldsymbol{\xi} = (\boldsymbol{\theta}_j, \boldsymbol{\tau}_j, \boldsymbol{\alpha}_j)$ . The variational Bayes method finds an approximation distribution  $q(\boldsymbol{\xi})$  that approximates  $p(\boldsymbol{\xi} | \mathbf{x}_j, \mathbf{X}_j)$ . The goal is to find  $q(\boldsymbol{\xi})$  that minimizes the Kullback-Leibler divergence  $\text{KL}(q(\boldsymbol{\xi}) || p(\boldsymbol{\xi} | \mathbf{x}_j, \mathbf{X}_j))$ :

$$q^*(\boldsymbol{\xi}) = \arg \min_{q(\boldsymbol{\xi})} \int q(\boldsymbol{\xi}) \ln \frac{q(\boldsymbol{\xi})}{p(\boldsymbol{\xi} | \mathbf{x}_j, \mathbf{X}_j)} d\boldsymbol{\xi} \quad (10)$$

$$= \arg \min_{q(\boldsymbol{\xi})} \int q(\boldsymbol{\xi}) \ln \frac{q(\boldsymbol{\xi})}{p(\boldsymbol{\xi}, \mathbf{x}_j, \mathbf{X}_j)} d\boldsymbol{\xi}. \quad (11)$$

However, it is difficult to minimize (11) for arbitrary distributions. We limit the optimization distributions to  $q(\boldsymbol{\xi})$  that can be factorized as

$$q(\boldsymbol{\theta}_j, \boldsymbol{\tau}_j, \boldsymbol{\alpha}_j) = q(\boldsymbol{\theta}_j) q(\boldsymbol{\tau}_j) q(\boldsymbol{\alpha}_j). \quad (12)$$

For  $\boldsymbol{\xi}_k \in \boldsymbol{\xi}$ , the variational Bayes method minimizes (11) by updating  $q(\boldsymbol{\xi}_k)$  sequentially. With the distribution  $q(\boldsymbol{\xi} \setminus \boldsymbol{\xi}_k)$  of  $\boldsymbol{\xi} \setminus \boldsymbol{\xi}_k$  fixed, the update equation of  $q(\boldsymbol{\xi}_k)$  is given as follows [Bishop, 2006].

$$\ln q^*(\boldsymbol{\xi}_k) = \mathbb{E}_{q(\boldsymbol{\xi} \setminus \boldsymbol{\xi}_k)} [\ln p(\boldsymbol{\xi}, \mathbf{x}_j, \mathbf{X}_j)] + \text{const}. \quad (13)$$

In the following, we describe concrete update equation of each  $q(\boldsymbol{\xi}_k)$ . To keep the description concise, for functions  $f(\boldsymbol{\xi}_k)$ , the expectation taken by  $q(\boldsymbol{\xi}_k)$  at the point is written as  $\langle f(\boldsymbol{\xi}_k) \rangle$ .

### Update equation of $q(\boldsymbol{\theta}_j)$

From (13), the update equation of  $q(\boldsymbol{\theta}_j)$  is

$$\ln q^*(\boldsymbol{\theta}_j) = \mathbb{E}_{q(\boldsymbol{\tau}_j)} [p(\mathbf{x}_j | \mathbf{X}_j, \boldsymbol{\theta}_j) p(\boldsymbol{\theta}_j | \boldsymbol{\tau}_j)] + \text{const}. \quad (14)$$

Using the assumption that  $p(\mathbf{x}_j | \mathbf{X}_j, \boldsymbol{\theta}_j)$  and  $p(\boldsymbol{\theta}_j | \boldsymbol{\tau}_j)$  are Gaussian distributions, we obtain

$$q^*(\boldsymbol{\theta}_j) = \mathcal{N}(\bar{\boldsymbol{\theta}}_j, \tilde{\boldsymbol{\Sigma}}_j), \quad (15)$$

$$\bar{\boldsymbol{\theta}}_j = s_\epsilon \tilde{\boldsymbol{\Sigma}}_j \mathbf{X}_j^T \mathbf{x}_j, \quad (16)$$

$$\tilde{\boldsymbol{\Sigma}}_j = (s_\epsilon \mathbf{X}_j^T \mathbf{X}_j + \langle \mathbf{S}_{\boldsymbol{\tau}_j} \rangle)^{-1}, \quad (17)$$

where

$$\mathbf{S}_{\boldsymbol{\tau}_j} = \text{diag} \left( \tau_{j,1}^{-1}, \dots, \tau_{j,m_j}^{-1} \right). \quad (18)$$

### Update equation of $q(\boldsymbol{\tau})$

From (13), the update equation of  $q(\boldsymbol{\tau})$  is

$$\ln q^*(\boldsymbol{\tau}) = \mathbb{E}_{q(\boldsymbol{\theta}_j, \boldsymbol{\alpha}_j)} [p(\mathbf{x}_j | \mathbf{X}_j, \boldsymbol{\theta}_j) p(\boldsymbol{\theta}_j | \boldsymbol{\tau}_j) p(\boldsymbol{\theta}_j | \boldsymbol{\alpha}_j)] + \text{const}. \quad (19)$$

From the model assumption, without loss of generality, we can assume that  $q(\boldsymbol{\tau}_j)$  is decomposed as

$$q(\boldsymbol{\tau}_j) = \prod_{i=1}^{m_j} q(\tau_{j,i}). \quad (20)$$

By arranging the terms in (19) that include  $\tau_{j,i}$ , we obtain

$$q^*(\tau_{j,i}) = \mathcal{GIG} \left( \langle \alpha_{j,i} \rangle, \langle \theta_{j,i}^2 \rangle, \frac{1}{2} \right), \quad (21)$$

---

where  $\mathcal{GIG}(a, b, \rho)$  denotes the generalized inverse Gaussian distribution, whose probability density function is given by

$$p(x; a, b, \rho) = \frac{(a/b)^{\rho/2}}{2K_{\rho}(\sqrt{ab})} x^{\rho-1} \exp\left(-\frac{ax + bx^{-1}}{2}\right), \quad (22)$$

where  $K_{\rho}$  is a modified Bessel function of the second kind. To update  $q(\boldsymbol{\theta}_j)$  and  $q(\boldsymbol{\alpha}_j)$ , we need the expected values  $\langle \tau_{j,i} \rangle$  and  $\langle \tau_{j,i}^{-1} \rangle$ . They are given by

$$\langle \tau_{j,i} \rangle = \frac{1 + \sqrt{\langle \tau_{j,i} \rangle \langle \theta_{j,i}^2 \rangle}}{\alpha_{j,i}}, \quad (23)$$

$$\langle \tau_{j,i}^{-1} \rangle = \sqrt{\frac{\langle \alpha_{j,i} \rangle}{\langle \theta_{j,i}^2 \rangle}}. \quad (24)$$

### Update equation of $q(\boldsymbol{\alpha})$

From (13), the update equation of  $q(\boldsymbol{\alpha})$  is

$$\ln q^*(\boldsymbol{\alpha}) = \mathbb{E}_{q(\boldsymbol{\tau})} [p(\boldsymbol{\tau}|\boldsymbol{\alpha})p(\boldsymbol{\alpha}; \kappa, \nu)] + \text{const.} \quad (25)$$

As in the case for  $\boldsymbol{\tau}_j$ , we can assume that  $q(\boldsymbol{\alpha}_j)$  is decomposed as

$$q(\boldsymbol{\alpha}_j) = \prod_{i=1}^{m_j} q(\alpha_{j,i}). \quad (26)$$

By arranging the terms in (25) that include  $\alpha_{j,i}$ , we obtain

$$q^*(\alpha_{j,i}) = \mathcal{GA}\left(\kappa + 1, \nu + \frac{\langle \tau_{j,i} \rangle}{2}\right), \quad (27)$$

where  $\mathcal{GA}(\kappa, \nu)$  is the gamma distribution, whose probability density function is given by

$$p(x; \kappa, \nu) = \frac{\nu^{\kappa}}{\Gamma(\kappa)} x^{\kappa-1} e^{-\nu x}. \quad (28)$$

To update  $q(\boldsymbol{\tau})$ , we need the expected value  $\langle \alpha_{j,i} \rangle$ . It is given by

$$\langle \alpha_{j,i} \rangle = (\kappa + 1) \left( \nu + \frac{\langle \tau_{j,i} \rangle}{2} \right). \quad (29)$$

### References

[Bishop, 2006] Bishop, C. M. (2006). *Pattern recognition and machine learning*. springer.
